# Supplementary material for: Plasma Hsp90 Level as a Marker of Early Acute Lymphoblastic Leukemia Engraftment and Progression in Mice
Source: PubMed Central journal article supplement (PMC4466233; doi:10.1371/journal.pone.0129298), 2015-06-11

# Supplementary figure 3

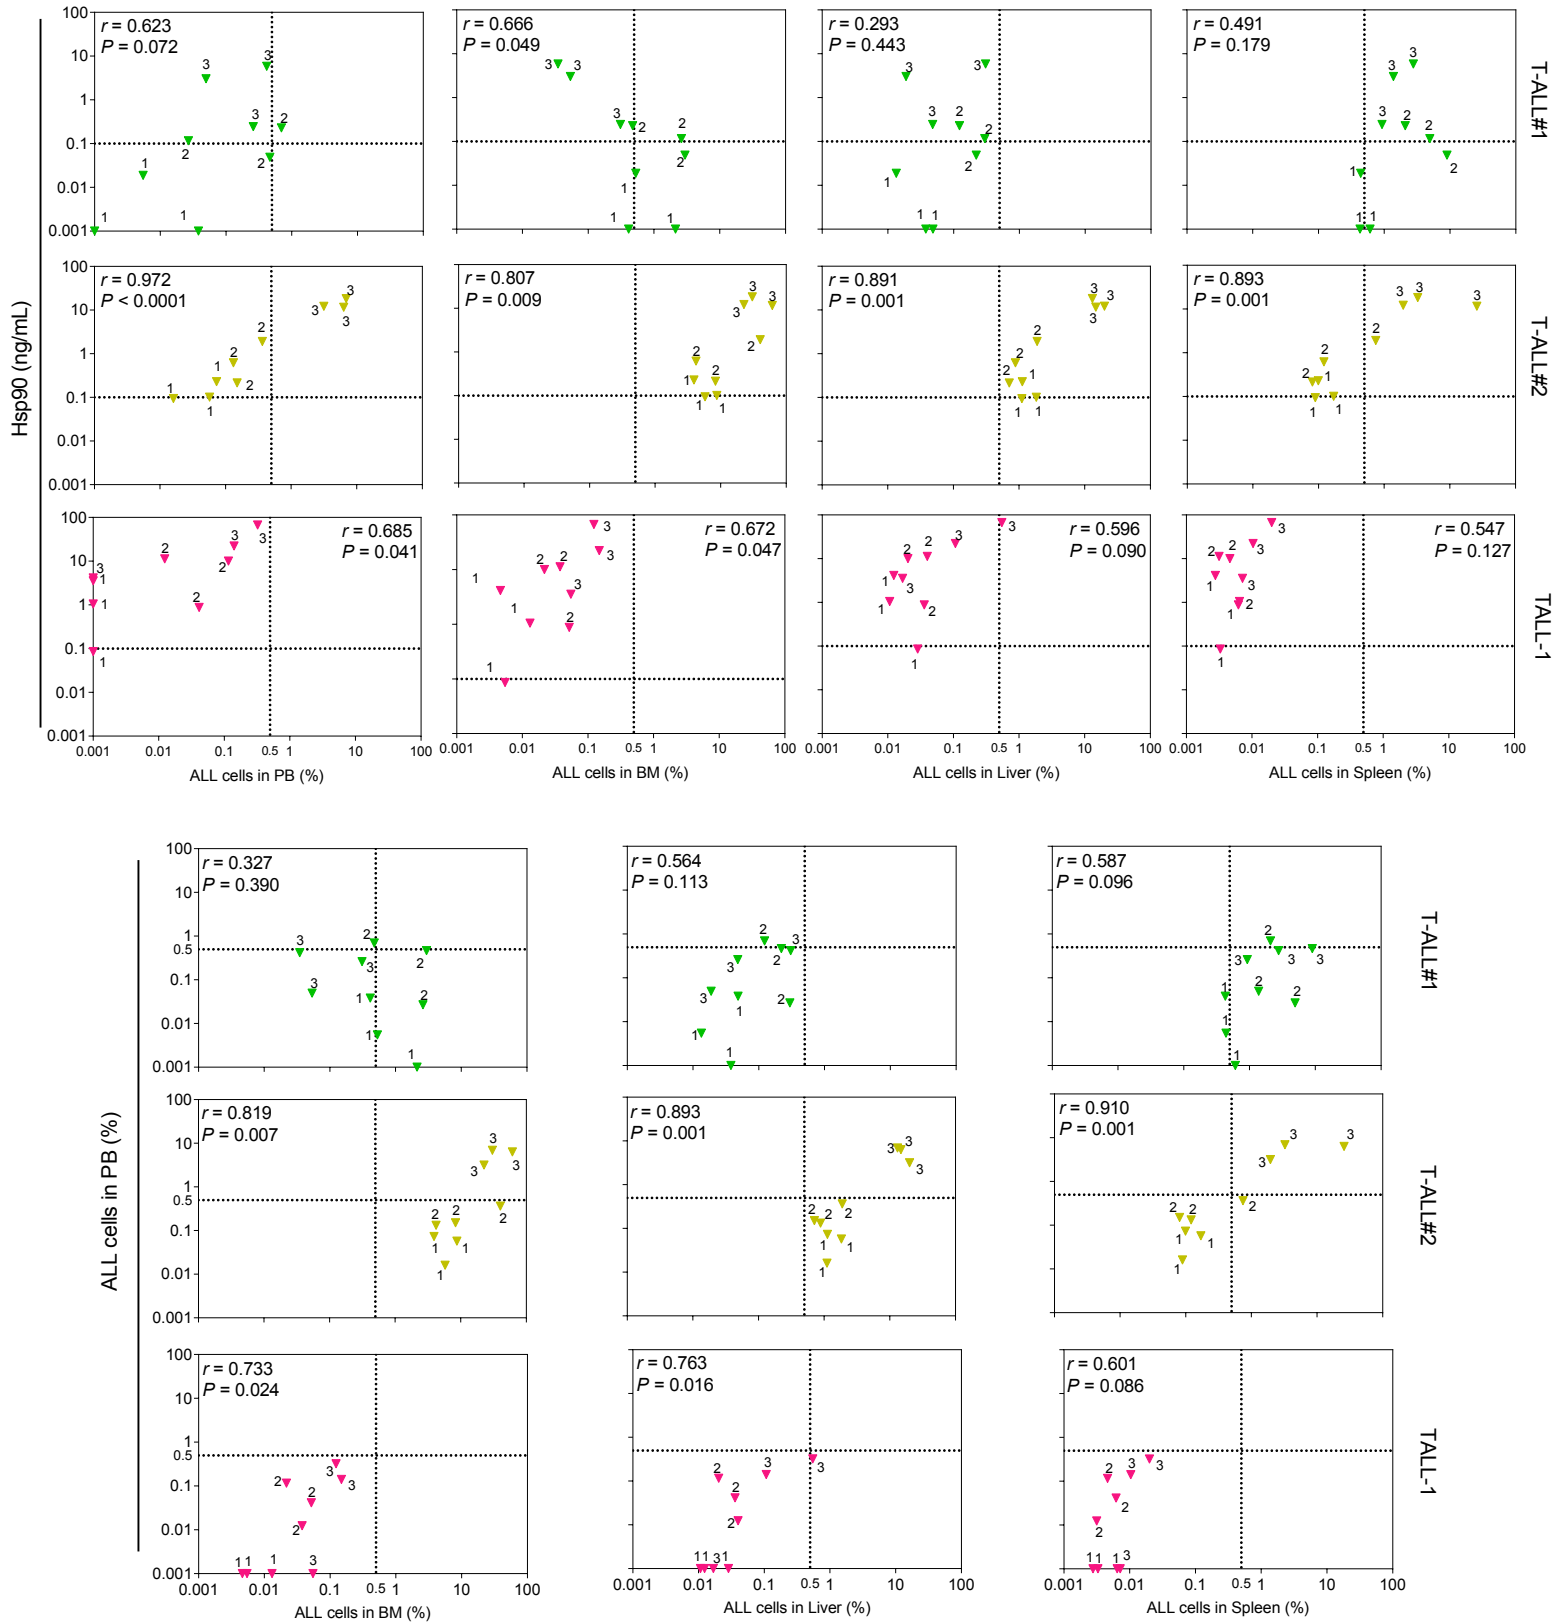

Supplement: pone.0129298.s003.pdf [file pone.0129298.s003.pdf]
